# Supplementary material for: Alzheimer’s disease early diagnostic and staging biomarkers revealed by large-scale cerebrospinal fluid and serum proteomic profiling
Source: PubMed Central journal article supplement — Innovation (Camb). 2024 Jan 2;5(1):100544. doi: 10.1016/j.xinn.2023.100544 (PMC10794110; doi:10.1016/j.xinn.2023.100544), 2024-01-02
Supplement: mmc2.pdf [file mmc2.pdf]

**Table S1** The demographic data of the discovery cohort.

| Variable                               | CN             | MCI           | AD            | ADM           | ADMO          | ADS           | ALS        | HD         | P      |
|----------------------------------------|----------------|---------------|---------------|---------------|---------------|---------------|------------|------------|--------|
| <b>N</b>                               | 20             | 7             | 31            | 6             | 12            | 13            | 20         | 20         | NA     |
| <b>Male/female</b>                     | 8/12           | 5/2           | 17/14         | 4/2           | 7/5           | 6/7           | 8/12       | 13/7       | 0.2    |
| <b>Age Onset, mean ± SD</b>            | NA             | 64.92±5.7     | 60.35±10.81   | 60.83±10.40   | 61.17±12.68   | 59.38±9.89    | 58.25±8.17 | 50.95±7.71 | NA     |
| <b>Age Diagnosis, mean ± SD</b>        | 63.30±8.81     | 66.14±4.81    | 63.13±10.37   | 62.33±10.03   | 63.08±12.93   | 63.54±8.55    | 59.3±7.80  | 58.3±4.81  | 0.851  |
| <b>MMSE, Mean ± SD</b>                 | 27.25±1.74     | 26.86±1.21    | 12.68±6.91    | 22.17±1.83    | 15.17±2.48    | 6.00±3.56     | NA         | NA         | <0.001 |
| <b>Education(years), Mean ± SD</b>     | 9.90±4.21      | 9.14±5.11     | 9.77±4.85     | 10.17±3.43    | 10.16±4.33    | 9.23±6.01     | NA         | NA         | 0.851  |
| <b>APOE E4 carrier (%)</b>             | 15.00%         | 42.86%        | 58.06%        | 66.67%        | 58.33%        | 46.15%        | NA         | NA         | 0.04   |
| <b>Mean CSF Aβ42 pg/ml (SD)</b>        | 1121.70±176.99 | 474.28±103.53 | 508.24±155.81 | 561.77±109.77 | 484.90±144.43 | 505.08±185.91 | NA         | NA         | <0.001 |
| <b>Mean CSF total tau pg/ml (SD)</b>   | 115.17±68.08   | 182.83±138.43 | 454.58±277.24 | 380.26±84.45  | 451.56±336.67 | 491.68±284.66 | NA         | NA         | <0.001 |
| <b>Mean CSF phospho-tau pg/ml (SD)</b> | 59.23±35.25    | 54.18±19.18   | 78.67±36.23   | 59.12±28.82   | 85.70±39.14   | 81.18±35.85   | NA         | NA         | <0.001 |

CN: cognitive normal; MCI: mild cognitive impairment; AD: Alzheimer's disease; ADM: AD mild stage, ADMO:AD moderate stage; ADS: AD severe stage; ALS: amyotrophic lateral sclerosis; HD: Huntington's disease; *p*: NC VS.MCI+AD; NA: not applicable; SD: standard deviation.
