# Supplementary material for: Alzheimer’s disease early diagnostic and staging biomarkers revealed by large-scale cerebrospinal fluid and serum proteomic profiling
Source: PubMed Central journal article supplement — Innovation (Camb). 2024 Jan 2;5(1):100544. doi: 10.1016/j.xinn.2023.100544 (PMC10794110; doi:10.1016/j.xinn.2023.100544), 2024-01-02
Supplement: mmc4.pdf [file mmc4.pdf]

**Table S3** The demographic data of validation cohort.

| Variable                           | CSF samples     |                 |                 |                 |                 |                 |              |              |              |        |
|------------------------------------|-----------------|-----------------|-----------------|-----------------|-----------------|-----------------|--------------|--------------|--------------|--------|
|                                    | CN              | MCI             | AD              | ADM             | ADMO            | ADS             | ALS          | HD           | FTD          | P      |
| <b>N</b>                           | 73              | 31              | 73              | 18              | 39              | 16              | 25           | 15           | 3            | NA     |
| <b>Male/female</b>                 | 49/24           | 13/18           | 34/39           | 8/10            | 16/23           | 10/6            | 15/10        | 9/6          | 2/1          | 0.02   |
| <b>Age Diagnosis, mean ± SD</b>    | 61.30 ± 10.75   | 63.39 ± 6.66    | 63.31 ± 8.15    | 64.39 ± 7.27    | 63.87 ± 8.81    | 61.31 ± 7.41    | 65.08 ± 3.26 | 49.60 ± 6.08 | 62.00 ± 4.35 | 0.144  |
| <b>MMSE, Mean ± SD</b>             | 28.37 ± 1.10    | 25.00 ± 2.38    | 14.99 ± 6.07    | 21.67 ± 2.06    | 15.05 ± 3.26    | 6.20 ± 3.05     | NA           | NA           | NA           | <0.001 |
| <b>Education(years), Mean ± SD</b> | 9.67 ± 4.87     | 10.71 ± 3.67    | 8.07 ± 4.12     | 10.28 ± 2.85    | 7.64 ± 4.26     | 6.73 ± 4.37     | NA           | NA           | NA           | 0.38   |
| <b>APOE E4 carrier (%)</b>         | 13.30%          | 32.00%          | 45.00%          | 50.00%          | 43.60%          | 37.50%          | NA           | NA           | NA           | <0.001 |
| <b>Mean CSF Aβ42 pg/ml</b>         | 624.21 ± 322.53 | 569.45 ± 269.95 | 455.39 ± 216.74 | 576.78± 340.65  | 515.38 ± 377.62 | 383.35 ± 220.01 | NA           | NA           | NA           | 0.02   |
| <b>Mean CSF total tau pg/ml</b>    | 380.31 ± 308.93 | 374.88 ± 261.45 | 535.90 ± 431.30 | 444.92 ± 228.85 | 816.08 ± 203.51 | 645.41 ±404.65  | NA           | NA           | NA           | 0.19   |
| <b>Mean CSF phospho-tau pg/ml</b>  | 44.53 ± 25.34   | 93.47 ± 80.61   | 130.87 ± 83.52  | 92.01 ±63.64    | 116.29 ± 89.93  | 139.35± 81.08   | NA           | NA           | NA           | <0.001 |
| Variable                           | Serum samples   |                 |                 |                 |                 |                 |              |              |              |        |
|                                    | CN              | MCI             | AD              | ADM             | ADMO            | ADS             | ALS          | HD           | FTD          | P      |
| <b>N</b>                           | 61              | 44              | 115             | 21              | 52              | 42              | 30           | 24           | 14           | NA     |
| <b>Male/female</b>                 | 37/24           | 26/18           | 72/43           | 13/8            | 30/22           | 29/13           | 24/6         | 13/11        | 7/7          | 0.03   |
| <b>Age Diagnosis, mean ± SD</b>    | 61.92 ± 9.76    | 65.53 ± 8.66    | 64.22 ± 9.45    | 67.05±9.02      | 64.23±10.23     | 61.98±8.43      | 64.83 ± 3.23 | 51.04 ± 6.45 | 60.86 ± 8.80 | 0.67   |
| <b>MMSE, Mean ± SD</b>             | 27.82 ± 1.64    | 24.13 ± 2.94    | 13.63.92 ± 7.13 | 21.10±1.55      | 13.88±4.10      | 6.33±3.18       | NA           | NA           | NA           | <0.001 |
| <b>Education(years), Mean ± SD</b> | 8.98 ± 4.51     | 9.81 ± 2.97     | 7.21 ± 4.94     | 10.95±4.71      | 7.10±4.57       | 5.35±4.58       | NA           | NA           | NA           | 0.07   |
| <b>APOE E4 carrier (%)</b>         | 10.90%          | 40.60%          | 45.23%          | 38.10%          | 51.92%          | 40.48%          | NA           | NA           | NA           | <0.001 |

CN: cognitive normal; MCI: mild cognitive impairment; AD: Alzheimer's disease; ADM: AD mild stage, ADMO:AD moderate stage; ADS: AD severe stage; ALS: amyotrophic lateral sclerosis; HD: Huntington's disease; FTD: frontotemporal dementia; p: NC VS. MCI+AD; NA: not applicable; SD: standard deviation
