# Supplementary material for: Alzheimer’s disease early diagnostic and staging biomarkers revealed by large-scale cerebrospinal fluid and serum proteomic profiling
Source: PubMed Central journal article supplement — Innovation (Camb). 2024 Jan 2;5(1):100544. doi: 10.1016/j.xinn.2023.100544 (PMC10794110; doi:10.1016/j.xinn.2023.100544), 2024-01-02
Supplement: mmc6.pdf [file mmc6.pdf]

**Table S5** The demographic data of the used subset from validation cohort.

|                                 | Serum sample     |                  |               |                  | <i>P</i> |
|---------------------------------|------------------|------------------|---------------|------------------|----------|
|                                 | CN               | MCI              | ALS           | FTD              |          |
| N                               | 31               | 41               | 14            | 14               | NA       |
| Male/female                     | 19/12            | 17/24            | 9/5           | 7/7              | 0.29     |
| Age Diagnosis, mean $\pm$ SD    | 61.39 $\pm$ 9.41 | 65.88 $\pm$ 8.32 | 62 $\pm$ 1.57 | 60.86 $\pm$ 8.80 | 0.07     |
| MMSE, Mean $\pm$ SD             | 28.16 $\pm$ 1.57 | 24.10 $\pm$ 2.95 | NA            | NA               | <0.001   |
| Education(years), Mean $\pm$ SD | 6.03 $\pm$ 3.32  | 7.67 $\pm$ 3.38  | NA            | NA               | 0.04     |
| APOE E4 carrier (%)             | 11.20%           | 41.50%           | NA            | NA               | <0.001   |

CN: cognitive normal; MCI: mild cognitive impairment; ALS: amyotrophic lateral sclerosis; FTD: frontotemporal dementia; *P*: NC VS. MCI+AD; NA: not applicable; SD: standard deviation
